# Supplementary material for: xProtCAS: A Toolkit for Extracting Conserved Accessible Surfaces from Protein Structures
Source: MDPI journal article supplement (doi:10.3390/biom13060906), 2023-05-30
Supplement: s1 [file s1]

**Table S2.** Benchmarking of different settings to define accessible residues. Columns in order: Atom type determines whether accessibility definition is based on any atom or only side chain atoms; The number of atoms is the least number of accessible atoms to consider the residue as accessible; The mean size of predicted patch; The mean size of actual interface; The mean intersections between the patch and interface; The mean total number of accessible residues per chain; The mean of recall (intersection/interface); The mean of precision (intersection/patch); The mean ratio between patch size and all accessible residues; Percentage of chains in the dataset with a non-zero intersection.

| Atoms type               | # atoms | Predicted patch | Actual interface | Intersection | # Residues | Recall | Precision | to all | Percentage |
|--------------------------|---------|-----------------|------------------|--------------|------------|--------|-----------|--------|------------|
| SLiM-domain interfaces   |         |                 |                  |              |            |        |           |        |            |
| side                     | 1       | 21              | 23               | 7            | 209        | 0.33   | 0.42      | 0.14   | 70         |
| side                     | 2       | 17              | 19               | 6            | 166        | 0.32   | 0.42      | 0.14   | 70         |
| side                     | 3       | 9               | 14               | 4            | 118        | 0.27   | 0.41      | 0.11   | 64         |
| side                     | 4       | 5               | 9                | 2            | 74         | 0.23   | 0.42      | 0.10   | 59         |
| side                     | 5       | 3               | 5                | 1            | 42         | 0.25   | 0.41      | 0.11   | 53         |
| any                      | 1       | 24              | 24               | 8            | 231        | 0.33   | 0.39      | 0.14   | 69         |
| any                      | 2       | 21              | 23               | 7            | 209        | 0.33   | 0.40      | 0.14   | 70         |
| any                      | 3       | 18              | 19               | 6            | 177        | 0.33   | 0.40      | 0.14   | 69         |
| any                      | 4       | 11              | 11               | 4            | 136        | 0.26   | 0.40      | 0.11   | 64         |
| any                      | 5       | 6               | 15               | 2            | 93         | 0.24   | 0.39      | 0.11   | 59         |
| Domain-domain interfaces |         |                 |                  |              |            |        |           |        |            |
| side                     | 1       | 16              | 36               | 6            | 143        | 0.19   | 0.42      | 0.13   | 70         |
| side                     | 2       | 12              | 32               | 5            | 118        | 0.18   | 0.44      | 0.12   | 69         |
| side                     | 3       | 8               | 24               | 4            | 86         | 0.16   | 0.46      | 0.11   | 64         |
| side                     | 4       | 5               | 16               | 2            | 56         | 0.14   | 0.45      | 0.10   | 58         |
| side                     | 5       | 3               | 9                | 1            | 32         | 0.15   | 0.46      | 0.11   | 58         |
| any                      | 1       | 18              | 39               | 7            | 159        | 0.18   | 0.40      | 0.13   | 70         |
| any                      | 2       | 17              | 37               | 7            | 146        | 0.20   | 0.43      | 0.13   | 71         |
| any                      | 3       | 13              | 33               | 6            | 125        | 0.18   | 0.44      | 0.12   | 68         |
| any                      | 4       | 9               | 27               | 4            | 99         | 0.16   | 0.46      | 0.11   | 66         |

|     |   |   |    |   |    |      |      |      |    |
|-----|---|---|----|---|----|------|------|------|----|
| any | 5 | 6 | 20 | 3 | 70 | 0.13 | 0.43 | 0.10 | 57 |
|-----|---|---|----|---|----|------|------|------|----|
