# Supplementary material for: xProtCAS: A Toolkit for Extracting Conserved Accessible Surfaces from Protein Structures
Source: MDPI journal article supplement (doi:10.3390/biom13060906), 2023-05-30
Supplement: s1 [file s1]

**Table S4.** Comparison between functional patches extracted by 2 different approaches, PatchFinder and xProtCAS. The 2 approaches are tested to find residues in the SLiM-domain and domain-domain interfaces.

|                          | PatchFinder                                                    | xProtCAS                                                                        |
|--------------------------|----------------------------------------------------------------|---------------------------------------------------------------------------------|
| Method                   | R4S<br>↓<br>PatchFinder<br>(Heuristic algorithm)<br>↓<br>Patch | WCS<br>↓<br>Eigenvector Centrality and<br>Hierarchical clustering<br>↓<br>Patch |
| Speed                    | Slow (Minutes)                                                 | Fast (Milliseconds)                                                             |
| SLiM-domain interfaces   |                                                                |                                                                                 |
| Patch size mean          | 25                                                             | 21                                                                              |
| Patch size std           | 32                                                             | 20                                                                              |
| Precision mean           | 0.34                                                           | 0.41                                                                            |
| Recall mean              | 0.29                                                           | 0.32                                                                            |
| Domain-domain interfaces |                                                                |                                                                                 |
| Patch size mean          | 23                                                             | 16                                                                              |
| Patch size std           | 21                                                             | 12                                                                              |
| Precision mean           | 0.21                                                           | 0.41                                                                            |
| Recall mean              | 0.13                                                           | 0.18                                                                            |
